# Supplementary material
Source: Frontiers journal article supplement (https://www.frontiersin.org/articles/211884)
Supplement: Table_2.PDF [file Table_2.PDF]

|         | Hard floor |            | Foam     |            |
|---------|------------|------------|----------|------------|
|         | Eye Open   | Eye closed | Eye open | Eye Closed |
| PD      | 100%       | 100%       | 82%      | 82%        |
| Control | 100%       | 100%       | 100%     | 100%       |

**Supplemental table 2:** Percent a successful standing up in populations of Parkinsonian patients (PD) and the healthy subjects (control).
